# Supplementary material for: Impact of Lipid Sources on Quality Traits of Medical Cannabis-Based Oil Preparations
Source: PubMed Central journal article supplement (PMC7412533; doi:10.3390/molecules25132986), 2020-06-30
Supplement: molecules-25-02986-s001.pdf [file molecules-25-02986-s001.pdf]

# Impact of lipid sources on quality traits of medical cannabis based oil preparations

Alberto Ramella <sup>a</sup>, Gabriella Roda<sup>b</sup>, Radmila Pavlovic<sup>c\*</sup>, Michele Dei Cas<sup>d</sup>, Eleonora Casagni<sup>b</sup>, Giacomo Mosconi<sup>b</sup>, Francisco Cecati<sup>e</sup>, Paola Minghetti<sup>b</sup>, Carlo Grizzetti<sup>f</sup>

<sup>a</sup> Farmacia Dott.ri Giuliana e Alberto Ramella – SAS. Via A. Diaz 1. Angera (VA). 21021. Italy

<sup>b</sup> Department of Pharmaceutical Sciences. Università degli Studi di Milano. Via L. Mangiagalli 25. Milan. 20133. Italy

<sup>c</sup> Department of Health. Animal Science and Food Safety. University of Milan. Milan. Italy

<sup>d</sup> Department of Health Sciences. Università degli Studi di Milano. Via A.di Rudinì 8. Milan. 20142. Italy

<sup>e</sup> INTEQUI-CONICET. Faculty of Chemistry. Biochemistry and Pharmacy. National University of San Luis. Almirante Brown 1455. CP 5700 San Luis. Argentina

<sup>f</sup> S.S.D. Cure Palliative e Terapia del Dolore. Ospedale di Circolo – Fondazione Macchi. ASST Sette Laghi. Viale L. Borri 57. Varese. 21100. Italy

## Supplementary materials

**Figure S1.** Structural formula of investigated cannabinoids

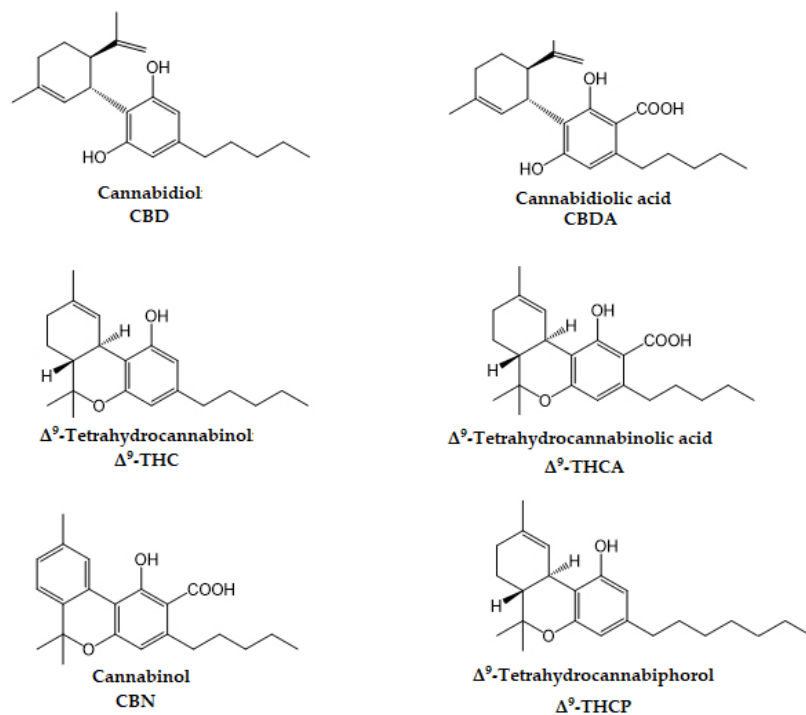

**Table S1.** Concentration of cannabinoids (ppm) in Bedrocan oils as a function of the storage times and lipid sources

|                                        | T 0          |             | T 15         |             | T 30         |             | T 45         |             | T 60         |                 | T 75         |             | T 90         |             |
|----------------------------------------|--------------|-------------|--------------|-------------|--------------|-------------|--------------|-------------|--------------|-----------------|--------------|-------------|--------------|-------------|
| <b>PhEur grade olive oil (OOPH)</b>    | <b>mean</b>  | <b>s.d.</b> | <b>mean</b>  | <b>s.d.</b> | <b>mean</b>  | <b>s.d.</b> | <b>mean</b>  | <b>s.d.</b> | <b>mean</b>  | <b>s.d. (±)</b> | <b>mean</b>  | <b>s.d.</b> | <b>mean</b>  | <b>s.d.</b> |
|                                        | <b>(n=4)</b> | <b>(±)</b>  | <b>(n=4)</b> | <b>(±)</b>  | <b>(n=4)</b> | <b>(±)</b>  | <b>(n=4)</b> | <b>(±)</b>  | <b>(n=4)</b> |                 | <b>(n=4)</b> | <b>(±)</b>  | <b>(n=4)</b> | <b>(±)</b>  |
| <b>CBD</b>                             | 414.18       | 0.72        | 361.86       | 0.46        | 363.45       | 10.91       | 361.59       | 5.62        | 154.90       | 5.19            | 185.73       | 1.04        | 175.81       | 1.47        |
| <b>Δ<sup>9</sup>-THC</b>               | 23123.96     | 1082.11     | 21551.89     | 293.36      | 23219.49     | 1700.18     | 21469.72     | 417.86      | 23160.49     | 201.16          | 20777.59     | 253.82      | 16425.32     | 424.88      |
| <b>CBN</b>                             | 99.86        | 10.76       | 76.79        | 13.91       | 157.87       | 5.82        | 142.27       | 12.15       | 208.94       | 8.66            | 276.89       | 9.21        | 255.91       | 2.69        |
| <b>CBDA</b>                            | 337.31       | 0.40        | 278.82       | 0.62        | 295.19       | 1.98        | 277.47       | 0.77        | 149.05       | 35.65           | 143.18       | 0.99        | 155.45       | 0.23        |
| <b>Δ<sup>9</sup>-THCA</b>              | 413.39       | 0.76        | 322.85       | 21.01       | 358.83       | 9.39        | 367.42       | 2.44        | 230.84       | 12.36           | 266.16       | 2.42        | 208.99       | 39.03       |
|                                        |              |             |              |             |              |             |              |             |              |                 |              |             |              |             |
|                                        | T 0          |             | T 15         |             | T 30         |             | T 45         |             | T 60         |                 | T 75         |             | T 90         |             |
| <b>Medium chain Triglyceride (MCT)</b> | <b>mean</b>  | <b>s.d.</b> | <b>mean</b>  | <b>s.d.</b> | <b>mean</b>  | <b>s.d.</b> | <b>mean</b>  | <b>s.d.</b> | <b>mean</b>  | <b>s.d.</b>     | <b>mean</b>  | <b>s.d.</b> | <b>mean</b>  | <b>s.d.</b> |
|                                        | <b>(n=4)</b> | <b>(±)</b>  | <b>(n=4)</b> | <b>(±)</b>  | <b>(n=4)</b> | <b>(±)</b>  | <b>(n=4)</b> | <b>(±)</b>  | <b>(n=4)</b> | <b>(±)</b>      | <b>(n=4)</b> | <b>(±)</b>  | <b>(n=4)</b> | <b>(±)</b>  |
| <b>CBD</b>                             | 420.13       | 1.72        | 361.22       | 2.29        | 359.39       | 0.45        | 363.17       | 1.05        | 156.29       | 8.69            | 186.83       | 1.53        | 178.99       | 3.96        |
| <b>Δ<sup>9</sup>-THC</b>               | 21520.15     | 831.87      | 22197.35     | 584.73      | 20241.89     | 343.09      | 21107.45     | 359.77      | 22504.11     | 96.84           | 20969.17     | 431.09      | 17190.08     | 67.89       |
| <b>CBN</b>                             | 88.42        | 9.78        | 135.38       | 8.25        | 132.12       | 3.88        | 128.96       | 9.69        | 210.95       | 5.47            | 274.80       | 2.54        | 250.03       | 1.36        |
| <b>CBDA</b>                            | 335.36       | 1.36        | 282.11       | 0.92        | 295.75       | 0.67        | 278.06       | 0.47        | 120.08       | 0.69            | 142.87       | 1.13        | 156.63       | 1.22        |
| <b>Δ<sup>9</sup>-THCA</b>              | 379.49       | 34.07       | 360.00       | 9.06        | 359.09       | 9.04        | 385.77       | 1.59        | 232.39       | 6.25            | 275.69       | 6.35        | 245.46       | 0.78        |

**Table S2.** Concentration of cannabinoids (ppm) in Bediol oils as a function of the storage times and lipid sources

|                                        | T 0        |          | T15        |          | T 30       |          | T45        |          | T 60       |          | T 75       |          | T 90       |          |
|----------------------------------------|------------|----------|------------|----------|------------|----------|------------|----------|------------|----------|------------|----------|------------|----------|
| <b>PhEur grade olive oil (OOPH)</b>    | mean (n=4) | s.d. (±) | mean (n=4) | s.d. (±) | mean (n=4) | s.d. (±) | mean (n=4) | s.d. (±) | mean (n=4) | s.d. (±) | mean (n=4) | s.d. (±) | mean (n=4) | s.d. (±) |
| <b>CBD</b>                             | 8803.17    | 174.12   | 8917.29    | 263.70   | 8097.82    | 374.20   | 7723.68    | 242.49   | 8564.07    | 31.78    | 7549.44    | 122.45   | 5566.34    | 133.27   |
| <b>Δ<sup>9</sup>-THC</b>               | 7469.21    | 187.75   | 7400.85    | 227.64   | 7280.60    | 398.47   | 6617.54    | 275.86   | 7347.22    | 21.52    | 6447.71    | 191.46   | 5138.76    | 132.80   |
| <b>CBN</b>                             | 59.84      | 4.11     | 67.85      | 2.39     | 66.94      | 16.86    | 65.86      | 2.26     | 147.73     | 1.73     | 210.70     | 6.57     | 200.63     | 2.04     |
| <b>CBDA</b>                            | 651.06     | 189.29   | 824.87     | 28.18    | 667.30     | 51.94    | 707.18     | 8.84     | 641.29     | 30.27    | 183.98     | 1.42     | 479.16     | 8.89     |
| <b>Δ<sup>9</sup>-THCA</b>              | 344.71     | 34.94    | 255.91     | 4.05     | 258.97     | 1.78     | 431.52     | 6.91     | 159.62     | 1.27     | 185.87     | 1.43     | 182.11     | 1.18     |
|                                        |            |          |            |          |            |          |            |          |            |          |            |          |            |          |
|                                        | T 0        |          | T 15       |          | T 30       |          | T 45       |          | T 60       |          | T 75       |          | T 90       |          |
| <b>Medium chain Triglyceride (MCT)</b> | mean (n=4) | s.d. (±) | mean (n=4) | s.d. (±) | mean (n=4) | s.d. (±) | mean (n=4) | s.d. (±) | mean (n=4) | s.d. (±) | mean (n=4) | s.d. (±) | mean (n=4) | s.d. (±) |
| <b>CBD</b>                             | 8446.55    | 65.63    | 8512.23    | 209.66   | 7675.90    | 560.55   | 8059.71    | 817.44   | 8690.26    | 34.28    | 7113.56    | 44.19    | 4919.21    | 76.26    |
| <b>Δ<sup>9</sup>-THC</b>               | 8534.96    | 514.43   | 7545.96    | 229.91   | 7294.54    | 458.91   | 7628.01    | 952.03   | 7809.98    | 75.19    | 6362.37    | 25.09    | 4759.49    | 123.04   |
| <b>CBN</b>                             | 59.09      | 2.24     | 62.10      | 0.20     | 63.61      | 10.57    | 71.80      | 13.54    | 151.27     | 5.75     | 198.91     | 11.76    | 180.95     | 21.72    |
| <b>CBDA</b>                            | 1195.29    | 142.96   | 1370.94    | 90.16    | 1097.92    | 128.50   | 1195.39    | 141.57   | 1120.80    | 58.21    | 1054.90    | 12.10    | 759.87     | 25.65    |
| <b>Δ<sup>9</sup>-THCA</b>              | 330.30     | 14.57    | 302.44     | 7.08     | 293.70     | 8.17     | 304.02     | 6.25     | 193.77     | 3.71     | 219.52     | 7.89     | 201.35     | 1.39     |

**Table S3.** Concentration of terpenes (ppm) in Bediol oils obtained using OOPH as a function of the storage time

| RT                   | Compound                  | RI   | Storage days |      |             |      |             |      |             |                  |             |                  |             |                  |             |                  |
|----------------------|---------------------------|------|--------------|------|-------------|------|-------------|------|-------------|------------------|-------------|------------------|-------------|------------------|-------------|------------------|
|                      |                           |      | T 0          |      | T 15        |      | T 30        |      | T 45        |                  | T 60        |                  | T 75        |                  | T 90        |                  |
|                      |                           |      | Mean         | ±SD  | Mean        | ±SD  | Mean        | ±SD  | Mean        | ±SD <sup>d</sup> | Mean        | ±SD <sup>d</sup> | Mean        | ±SD <sup>d</sup> | Mean        | ±SD <sup>d</sup> |
| <b>Aldehydes</b>     |                           |      |              |      |             |      |             |      |             |                  |             |                  |             |                  |             |                  |
| 8.98                 | Hexanal                   | 785  | n.d.         |      | n.d.        |      | n.d.        |      | n.d.        |                  | n.d.        |                  | 1.32        | 0.13             | 0.72        | 0.01             |
|                      | <i>tot</i>                |      |              |      |             |      |             |      |             |                  |             |                  | <b>1.32</b> |                  | <b>0.72</b> |                  |
| <b>Alcohols</b>      |                           |      |              |      |             |      |             |      |             |                  |             |                  |             |                  |             |                  |
| 20.01                | 1-Hexanol                 | 831  | 5.13         | 0.36 | 5.43        | 1.63 | 3.28        | 0.31 | 3.52        | 0.97             | 2.54        | 3.12             | 3.21        | 0.24             | 2.10        | 0.03             |
|                      | <i>tot</i>                |      | <b>5.13</b>  |      | <b>5.43</b> |      | <b>3.28</b> |      | <b>3.52</b> |                  | <b>2.54</b> |                  | <b>3.21</b> |                  | <b>2.10</b> |                  |
| <b>Esters</b>        |                           |      |              |      |             |      |             |      |             |                  |             |                  |             |                  |             |                  |
| 21.66                | Butanoic acid-hexyl ester | 1183 | 5.57         | 0.63 | 6.32        | 1.17 | 2.37        | 0.78 | 2.14        | 0.24             | 3.08        | 3.89             | 3.15        | 1.07             | 1.94        | 0.09             |
| 26.02                | Hexanoic acid-hexyl ester | 1381 | 1.01         | 0.17 | 0.89        | 0.30 | 0.19        | 0.04 | 0.29        | 0.05             | 0.39        | 0.48             | 0.38        | 0.04             | 0.31        | 0.08             |
| 29.81                | β-Phenethyl acetate       | 1410 | 0.68         | 0.16 | 0.68        | 0.11 | 0.15        | 0.08 | 0.21        | 0.01             | 0.43        | 0.50             | 0.28        | 0.09             | 0.14        | 0.00             |
|                      | <i>tot</i>                |      | <b>7.26</b>  |      | <b>7.89</b> |      | <b>2.72</b> |      | <b>2.65</b> |                  | <b>3.90</b> |                  | <b>3.81</b> |                  | <b>2.39</b> |                  |
| <b>Organic acids</b> |                           |      |              |      |             |      |             |      |             |                  |             |                  |             |                  |             |                  |
| 22.23                | Acetic acid               | 576  | n.d.         |      | n.d.        |      | n.d.        |      | 2.40        | 0.20             | 0.57        | 0.47             | 0.31        | 0.08             | 0.26        | 0.03             |
| 26.17                | Butanoic acid             | 775  | n.d.         |      | n.d.        |      | n.d.        |      | n.d.        |                  | n.d.        |                  | n.d.        |                  | n.d.        |                  |
| 30.32                | Hexanoic acid             | 974  | 0.69         | 0.14 | 0.75        | 0.48 | 0.39        | 0.20 | 1.39        | 0.02             | 2.21        | 2.70             | 0.00        | 0.00             | 0.00        | 0.00             |
| 32.1                 | Heptanoic acid            | 1073 | 0.68         | 0.07 | 0.73        | 0.18 | 0.44        | 0.15 | 1.43        | 0.06             | 1.66        | 2.06             | 0.47        | 0.15             | 0.22        | 0.02             |
| 33.04                | Octanoic acid             | 1173 | 0.21         | 0.07 | 0.33        | 0.02 | 0.11        | 0.05 | 0.08        | 0.00             | 0.13        | 0.16             | 0.04        | 0.01             | 0.03        | 0.00             |
| 34.11                | Nonanoic acid             | 1272 | 0.24         | 0.08 | 0.58        | 0.56 | 0.31        | 0.11 | 0.09        | 0.01             | 0.45        | 0.58             | 0.13        | 0.01             | 0.07        | 0.03             |
|                      | <i>tot</i>                |      | <b>1.81</b>  |      | <b>2.39</b> |      | <b>1.25</b> |      | <b>5.38</b> |                  | <b>5.02</b> |                  | <b>0.94</b> |                  | <b>0.57</b> |                  |
| <b>Monoterpenes</b>  |                           |      |              |      |             |      |             |      |             |                  |             |                  |             |                  |             |                  |
| 9.88                 | β-Pinene                  | 989  | 1.56         | 0.03 | 1.54        | 0.36 | 2.34        | 0.23 | 1.28        | 0.38             | 0.86        | 1.03             | 2.84        | 0.01             | 1.36        | 0.09             |
| 12.14                | δ-3-Carene                | 1015 | 2.41         | 0.05 | 2.34        | 0.02 | 1.85        | 0.55 | 2.22        | 0.15             | 1.42        | 1.63             | 1.89        | 0.35             | 0.95        | 0.09             |
| 12.94                | α-Phellandrene            | 1017 | 2.57         | 0.07 | 3.01        | 0.17 | 1.06        | 0.35 | 1.13        | 0.25             | 1.13        | 1.34             | 1.33        | 0.16             | 0.87        | 0.03             |
| 13.38                | β-Myrcene                 | 1023 | 115.57       | 0.70 | 112.95      | 2.02 | 62.15       | 3.40 | 38.92       | 3.77             | 37.65       | 42.39            | 68.51       | 4.74             | 54.43       | 3.17             |
| 13.64                | α-Terpinene               | 1026 | 3.68         | 0.39 | 5.63        | 0.19 | 1.87        | 0.16 | 0.97        | 0.17             | 1.25        | 1.50             | 2.08        | 1.05             | 1.75        | 1.15             |
| 14.48                | Limonene                  | 1038 | 3.92         | 0.33 | 5.19        | 0.56 | 2.23        | 0.41 | 2.63        | 0.15             | 2.59        | 3.03             | 3.41        | 1.08             | 1.83        | 0.19             |

|                       |                         |      |               |      |               |       |               |       |               |      |               |       |               |      |               |      |
|-----------------------|-------------------------|------|---------------|------|---------------|-------|---------------|-------|---------------|------|---------------|-------|---------------|------|---------------|------|
| 14.78                 | $\beta$ -Sabinene       | 1044 | 7.39          | 0.13 | 8.99          | 1.01  | 5.20          | 0.85  | 4.86          | 0.61 | 4.26          | 4.86  | 7.86          | 1.65 | 4.79          | 0.54 |
| 16.43                 | $\gamma$ -Terpinene     | 1066 | 4.23          | 0.25 | 6.11          | 0.26  | 1.93          | 1.25  | 1.72          | 0.20 | 2.05          | 2.51  | 2.32          | 0.78 | 2.03          | 0.48 |
| 16.9                  | $\beta$ -Ocimene        | 1070 | 8.28          | 2.79 | 11.75         | 1.80  | 5.71          | 1.37  | 4.46          | 0.52 | 5.44          | 6.58  | 6.79          | 0.97 | 5.49          | 0.52 |
| 17.26                 | p-Cymene                | 1083 | 22.68         | 2.97 | 22.64         | 5.63  | 40.70         | 17.38 | 66.10         | 0.65 | 25.06         | 28.85 | 18.30         | 6.61 | 5.13          | 0.42 |
| 17.71                 | $\alpha$ -Terpinolene   | 1094 | 58.57         | 4.55 | 73.02         | 11.83 | 36.00         | 3.07  | 31.53         | 0.31 | 32.73         | 40.08 | 26.55         | 3.24 | 19.26         | 1.05 |
| 21.98                 | Cymenene                | 1120 | 13.34         | 0.32 | 15.82         | 4.98  | 15.78         | 6.29  | 18.55         | 3.57 | 15.11         | 18.07 | 8.37          | 1.15 | 4.66          | 0.75 |
| 22.63                 | 4,8-Epoxy-p-menth-1-ene | 1177 | 0.58          | 0.10 | 0.50          | 0.04  | 0.74          | 0.18  | 0.28          | 0.03 | 0.28          | 0.34  | 0.42          | 0.04 | 0.19          | 0.04 |
| 25.33                 | Fenchyl alcohol         | 1198 | 0.37          | 0.10 | 0.33          | 0.14  | 0.23          | 0.16  | 0.15          | 0.01 | 0.18          | 0.22  | 0.14          | 0.02 | 0.13          | 0.01 |
| 25.69                 | 4-Terpineol             | 1209 | n.d.          |      | n.d.          |       | n.d.          |       | n.d.          |      | n.d.          |       | n.d.          |      | n.d.          |      |
| 27.4                  | 1,8-Menthadien-4-ol     | 1217 | 1.86          | 0.30 | 1.57          | 0.32  | 0.92          | 0.31  | 2.00          | 0.07 | 1.83          | 2.25  | 1.44          | 0.61 | 0.66          | 0.04 |
| 27.6                  | $\alpha$ -Terpineol     | 1225 | 2.30          | 0.91 | 1.97          | 0.61  | 0.97          | 0.29  | 2.69          | 0.01 | 2.20          | 2.69  | 1.55          | 0.72 | 1.01          | 0.31 |
| 29.66                 | trans-2,3-Epoxycaren    | 1245 | 0.15          | 0.02 | 0.10          | 0.02  | 0.06          | 0.00  | 0.10          | 0.02 | 0.09          | 0.11  | 0.05          | 0.03 | 0.11          | 0.06 |
| 30.4                  | P-Cymenol               | 1293 | 0.89          | 0.33 | 0.77          | 0.07  | 0.36          | 0.01  | 0.77          | 0.08 | 0.59          | 0.71  | 0.60          | 0.17 | 0.35          | 0.02 |
|                       | <b>tot</b>              |      | <b>250.35</b> |      | <b>274.21</b> |       | <b>180.09</b> |       | <b>180.36</b> |      | <b>134.73</b> |       | <b>154.46</b> |      | <b>105.00</b> |      |
| <b>Sesquiterpenes</b> |                         |      |               |      |               |       |               |       |               |      |               |       |               |      |               |      |
| 25.47                 | $\alpha$ -Bergamotene   | 1430 | 0.48          | 0.01 | 0.57          | 0.14  | 0.49          | 0.16  | 1.20          | 0.04 | 0.99          | 1.24  | 0.64          | 0.43 | 0.29          | 0.02 |
| 25.58                 | $\gamma$ -Caryophyllene | 1482 | 26.92         | 8.00 | 21.12         | 8.92  | 7.57          | 2.24  | 21.98         | 0.17 | 18.11         | 22.39 | 9.17          | 4.79 | 5.37          | 0.19 |
| 27.05                 | $\alpha$ -Humulene      | 1494 | 4.95          | 1.50 | 3.87          | 1.85  | 1.80          | 0.65  | 5.52          | 0.26 | 4.20          | 5.26  | 2.19          | 1.65 | 0.89          | 0.28 |
| 27.51                 | sesquiterpene           | 1485 | n.d.          |      | n.d.          |       | n.d.          |       | n.d.          |      | n.d.          |       | n.d.          |      | n.d.          |      |
| 28.03                 | $\delta$ -Guaiene       | 1490 | 6.56          | 1.32 | 4.72          | 2.17  | 2.24          | 0.58  | 5.23          | 0.10 | 4.48          | 5.53  | 2.68          | 1.64 | 1.01          | 0.07 |
| 28.14                 | $\beta$ -Selinene       | 1507 | 1.89          | 0.34 | 1.36          | 0.64  | 0.67          | 0.22  | 1.48          | 0.49 | 1.51          | 1.91  | 0.91          | 0.59 | 0.28          | 0.01 |
| 28.33                 | $\alpha$ -Gurjunene     | 1519 | 0.57          | 0.20 | 0.59          | 0.16  | 0.19          | 0.09  | 1.11          | 0.00 | 1.30          | 1.64  | 0.58          | 0.17 | 1.03          | 0.15 |
| 29.19                 | Selina-3,7(11)-diene    | 1527 | 4.99          | 1.25 | 3.78          | 1.99  | 1.53          | 0.45  | 4.20          | 0.14 | 3.66          | 4.51  | 1.97          | 1.30 | 0.44          | 0.58 |
|                       | <b>tot</b>              |      | <b>46.36</b>  |      | <b>36.00</b>  |       | <b>14.49</b>  |       | <b>40.72</b>  |      | <b>34.25</b>  |       | <b>18.14</b>  |      | <b>9.31</b>   |      |

RT: retention time (min); Mean: Mean value (n = 3); Data are expressed in ppm SD: Standard deviation (n = 3); RI<sup>b</sup>: retention index calculated on a Rtx-Wax (30 m x 0.25 mm x 0.25 m f.t.)

**Table S4.** Concentration of terpenes (ppm) in Bediol oils obtained using MCT oil as a function of the storage time

| RT                          | Compound                  | RI   | Storage days |      |             |       |             |             |              |      |             |       |              |       |             |      |
|-----------------------------|---------------------------|------|--------------|------|-------------|-------|-------------|-------------|--------------|------|-------------|-------|--------------|-------|-------------|------|
|                             |                           |      | T0           |      | T15         |       | T30         |             | T45          |      | T60         |       | T75          |       | T90         |      |
|                             |                           |      | Mean         | ±SD  | Mean        | ±SD   | Mean        | ±SD         | Mean         | ±SD  | Mean        | ±SD   | Mean         | ±SD   | Mean        | ±SD  |
| <b><u>Aldehydes</u></b>     |                           |      |              |      |             |       |             |             |              |      |             |       |              |       |             |      |
| 8.98                        | Hexanal                   | 785  | n.d.         |      | n.d.        |       | n.d.        |             | n.d.         |      | n.d.        |       | n.d.         |       | n.d.        |      |
|                             | <i>tot</i>                |      |              |      |             |       |             |             |              |      |             |       |              |       |             |      |
| <b><u>Alcohols</u></b>      |                           |      |              |      |             |       |             |             |              |      |             |       |              |       |             |      |
| 20.01                       | 1-Hexanol                 | 831  | 8.51         | 1.08 | 4.24        | 4.69  | 6.38        | 2.50        | 10.70        | 4.33 | 8.80        | 1.70  | 12.73        | 0.09  | 6.39        | 1.17 |
|                             | <i>tot</i>                |      | <b>8.51</b>  |      | <b>4.24</b> |       | <b>6.38</b> | <b>2.50</b> | <b>10.70</b> |      | <b>8.80</b> |       | <b>12.73</b> |       | <b>6.39</b> |      |
| <b><u>Esters</u></b>        |                           |      |              |      |             |       |             |             |              |      |             |       |              |       |             |      |
| 21.66                       | Butanoic acid-hexyl ester | 1183 | 7.86         | 0.33 | 4.13        | 4.68  | 3.27        | 0.53        | 6.82         | 1.04 | 7.89        | 1.01  | 5.83         | 0.81  | 3.64        | 1.00 |
| 26.02                       | Hexanoic acid-hexyl ester | 1381 | 1.50         | 0.31 | 1.66        | 0.36  | 0.34        | 0.05        | 0.43         | 0.16 | 0.81        | 0.07  | 0.88         | 0.17  | 0.56        | 0.27 |
| 29.81                       | β-Phenethyl acetate       | 1410 | 0.56         | 0.06 | 0.55        | 0.02  | 0.12        | 0.04        | 0.07         | 0.04 | 0.11        | 0.02  | n.d.         |       | n.d.        |      |
|                             | <i>tot</i>                |      | <b>9.93</b>  |      | <b>6.34</b> |       | <b>3.73</b> |             | <b>7.31</b>  |      | <b>8.82</b> |       | <b>6.72</b>  |       | <b>4.20</b> |      |
| <b><u>Organic acids</u></b> |                           |      |              |      |             |       |             |             |              |      |             |       |              |       |             |      |
| 22.23                       | Acetic acid               | 576  | n.d.         |      | n.d.        |       | n.d.        |             | n.d.         |      | n.d.        |       | n.d.         |       | n.d.        |      |
| 26.17                       | Butanoic acid             | 775  | 2.19         | 0.14 | 2.24        | 0.38  | 0.31        | 0.11        | 6.78         | 0.06 | 4.87        | 1.44  | 0.39         | 0.03  | 0.29        | 0.00 |
| 30.32                       | Hexanoic acid             | 974  | 1.36         | 0.34 | 1.19        | 0.05  | 0.11        | 0.10        | 2.08         | 1.38 | 2.00        | 0.44  | n.d.         |       | n.d.        |      |
| 32.1                        | Heptanoic acid            | 1073 | 0.99         | 0.02 | 1.04        | 0.04  | 0.40        | 0.08        | 0.39         | 0.36 | 1.64        | 0.47  | 0.39         | 0.07  | 0.32        | 0.13 |
| 33.04                       | Octanoic acid             | 1173 | 0.68         | 0.00 | 0.73        | 0.03  | 0.38        | 0.06        | 0.32         | 0.32 | 0.80        | 0.07  | n.d.         |       | n.d.        |      |
| 34.11                       | Nonanoic acid             | 1272 | n.d.         |      | n.d.        |       | n.d.        |             | n.d.         |      | n.d.        |       | n.d.         |       | n.d.        |      |
|                             | <i>tot</i>                |      | <b>5.23</b>  |      | <b>5.20</b> |       | <b>1.20</b> |             | <b>9.57</b>  |      | <b>9.31</b> |       | <b>0.78</b>  |       | <b>0.61</b> |      |
| <b><u>Monoterpenes</u></b>  |                           |      |              |      |             |       |             |             |              |      |             |       |              |       |             |      |
| 9.88                        | β-Pinene                  | 989  | 4.52         | 0.24 | 5.20        | 0.34  | 6.39        | 1.24        | 3.71         | 0.19 | 3.60        | 0.26  | 6.56         | 0.58  | 3.17        | 0.46 |
| 12.14                       | δ-3-Carene                | 1015 | 4.86         | 0.76 | 5.00        | 0.37  | 1.94        | 0.89        | 4.03         | 0.50 | 5.58        | 0.50  | 4.51         | 2.40  | 3.38        | 0.60 |
| 12.94                       | α-Phellandrene            | 1017 | 5.39         | 0.52 | 5.57        | 0.08  | 2.64        | 0.11        | 2.80         | 0.06 | 4.42        | 0.39  | 4.25         | 0.22  | 2.31        | 0.13 |
| 13.38                       | β-Myrcene                 | 1023 | 186.70       | 0.42 | 193.47      | 16.51 | 205.80      | 5.63        | 114.69       | 7.62 | 155.18      | 25.72 | 148.95       | 11.52 | 132.79      | 8.57 |

|       |                              |      |               |      |               |       |               |      |               |      |               |      |               |       |               |       |
|-------|------------------------------|------|---------------|------|---------------|-------|---------------|------|---------------|------|---------------|------|---------------|-------|---------------|-------|
| 13.64 | $\alpha$ -Terpinene          | 1026 | 5.35          | 1.50 | 5.61          | 2.02  | 3.25          | 0.09 | 2.80          | 0.21 | 9.93          | 0.71 | 5.92          | 2.02  | 2.42          | 0.60  |
| 14.48 | Limonene                     | 1038 | 7.17          | 0.92 | 7.39          | 0.34  | 3.06          | 0.51 | 7.12          | 1.12 | 8.92          | 1.03 | 6.29          | 1.15  | 5.42          | 0.14  |
| 14.78 | $\beta$ -Sabinene            | 1044 | 15.62         | 1.36 | 16.24         | 2.76  | 9.55          | 1.32 | 11.20         | 3.76 | 14.69         | 0.97 | 15.00         | 5.40  | 12.77         | 3.98  |
| 16.43 | $\gamma$ -Terpinene          | 1066 | 6.99          | 0.52 | 39.92         | 46.31 | 2.88          | 0.51 | 4.84          | 0.76 | 8.80          | 0.67 | 7.05          | 0.47  | 5.19          | 1.49  |
| 16.9  | $\beta$ -Ocimene             | 1070 | 16.46         | 0.21 | 17.07         | 1.64  | 10.15         | 2.50 | 11.63         | 0.62 | 19.90         | 2.03 | 18.16         | 5.66  | 14.25         | 1.75  |
| 17.26 | p-Cymene                     | 1083 | 25.41         | 1.98 | 14.39         | 16.63 | 25.98         | 1.33 | 52.40         | 3.33 | 44.00         | 6.41 | 29.35         | 13.80 | 11.65         | 1.01  |
| 17.71 | $\alpha$ -Terpinolene        | 1094 | 101.54        | 6.85 | 104.85        | 1.54  | 72.55         | 5.66 | 76.43         | 4.70 | 93.49         | 0.90 | 83.02         | 16.99 | 48.14         | 11.28 |
| 21.98 | Cymenene                     | 1120 | 17.09         | 2.64 | 18.49         | 0.01  | 14.67         | 4.39 | 38.81         | 0.64 | 29.97         | 3.44 | 15.93         | 2.05  | 6.95          | 0.59  |
| 22.63 | 4,8-Epoxy-p-menth-1-ene      | 1177 | n.d.          |      | n.d.          |       | n.d.          |      | n.d.          |      | n.d.          |      | n.d.          |       | n.d.          |       |
| 25.33 | Fenchyl alcohol              | 1198 | 0.32          | 0.06 | 0.37          | 0.10  | 0.19          | 0.01 | 0.25          | 0.12 | 0.24          | 0.04 | 0.24          | 0.08  | 0.16          | 0.04  |
| 25.69 | 4-Terpineol                  | 1209 | 1.43          | 0.04 | 1.57          | 0.04  | 0.77          | 0.31 | 0.84          | 0.25 | 0.85          | 0.09 | 0.80          | 0.37  | 0.69          | 0.30  |
| 27.4  | 1,8-Menthadien-4-ol          | 1217 | 2.57          | 0.05 | 2.76          | 0.13  | 1.17          | 0.47 | 2.60          | 0.57 | 3.16          | 0.25 | 1.85          | 0.81  | 1.41          | 0.41  |
| 27.6  | $\alpha$ -Terpineol          | 1225 | 3.00          | 0.82 | 3.82          | 0.15  | 1.16          | 0.26 | 3.25          | 0.52 | 3.50          | 0.25 | 1.88          | 1.20  | 1.29          | 0.53  |
| 29.66 | <i>trans</i> -2,3-Epoxycaren | 1245 | 0.28          | 0.02 | 0.31          | 0.01  | 0.08          | 0.00 | 0.13          | 0.05 | 0.22          | 0.00 | n.d.          |       | n.d.          |       |
| 30.4  | P-Cymenol                    | 1293 | 0.67          | 0.11 | 0.80          | 0.03  | 0.52          | 0.19 | 0.80          | 0.30 | 1.02          | 0.29 | 0.72          | 0.32  | 0.47          | 0.16  |
|       | <b>tot</b>                   |      | <b>405.36</b> |      | <b>442.83</b> |       | <b>362.75</b> |      | <b>338.33</b> |      | <b>407.46</b> |      | <b>350.47</b> |       | <b>252.47</b> |       |

### Sesquiterpenes

|       |                         |      |              |      |              |      |              |      |              |      |              |      |              |       |              |      |
|-------|-------------------------|------|--------------|------|--------------|------|--------------|------|--------------|------|--------------|------|--------------|-------|--------------|------|
| 25.47 | $\alpha$ -Bergamotene   | 1430 | 2.78         | 0.29 | 3.04         | 0.32 | 1.03         | 0.24 | 2.00         | 0.63 | 2.38         | 0.62 | 1.35         | 0.70  | 0.69         | 0.10 |
| 25.58 | $\gamma$ -Caryophyllene | 1482 | 39.38        | 0.56 | 45.85        | 3.20 | 23.62        | 2.04 | 35.77        | 9.44 | 39.32        | 6.55 | 23.16        | 16.07 | 16.10        | 5.50 |
| 27.05 | $\alpha$ -Humulene      | 1494 | 7.90         | 0.49 | 9.45         | 0.58 | 3.57         | 1.10 | 8.55         | 2.31 | 9.70         | 0.91 | 4.52         | 3.09  | 2.69         | 0.96 |
| 27.51 | sesquiterpene           | 1485 | 0.42         | 0.15 | 1.59         | 0.67 | 0.41         | 0.15 | 1.02         | 0.34 | 1.13         | 0.06 | 0.79         | 0.71  | 0.55         | 0.26 |
| 28.03 | $\delta$ -Guaiene       | 1490 | 4.30         | 0.09 | 4.66         | 0.18 | 3.48         | 0.89 | 7.47         | 1.40 | 7.22         | 0.21 | 4.14         | 2.27  | 1.73         | 0.31 |
| 28.14 | $\beta$ -Selinene       | 1507 | 2.67         | 0.02 | 2.86         | 0.11 | 0.53         | 0.54 | 2.81         | 0.73 | 3.49         | 0.65 | 1.78         | 1.32  | 1.08         | 0.42 |
| 28.33 | $\alpha$ -Gurjunene     | 1519 | 0.60         | 0.18 | 0.51         | 0.02 | 0.38         | 0.16 | 0.89         | 0.25 | 0.86         | 0.16 | n.d.         |       | n.d.         |      |
| 29.19 | Selina-3,7(11)-diene    | 1527 | 3.11         | 0.04 | 3.35         | 0.13 | 2.51         | 0.48 | 5.43         | 1.26 | 6.31         | 0.64 | 3.43         | 2.04  | 1.68         | 0.41 |
|       | <b>tot</b>              |      | <b>61.17</b> |      | <b>71.30</b> |      | <b>35.53</b> |      | <b>63.93</b> |      | <b>70.42</b> |      | <b>39.18</b> |       | <b>24.51</b> |      |

RT: retention time (min); Mean: Mean value (n = 3); Data are expressed in ppm SD: Standard deviation (n = 3); RI<sup>b</sup>: retention index calculated on a Rtx-Wax (30 m x 0.25 mm x 0.25 m f.t.)

**Table S5.** Concentration of terpenes (ppm) in Bedrocan oils obtained using OOPH as a function of the storage time

| RT                   | Compound                  | RI   | Storage days |                  |              |                  |              |                  |             |                  |              |                  |             |                  |             |      |
|----------------------|---------------------------|------|--------------|------------------|--------------|------------------|--------------|------------------|-------------|------------------|--------------|------------------|-------------|------------------|-------------|------|
|                      |                           |      | T0           |                  | T15          |                  | T30          |                  | T45         |                  | T60          |                  | T75         |                  | T90         |      |
|                      |                           |      | Mean         | ±SD <sup>d</sup> | Mean         | ±SD <sup>d</sup> | Mean         | ±SD <sup>d</sup> | Mean        | ±SD <sup>d</sup> | Mean         | ±SD <sup>d</sup> | Mean        | ±SD <sup>d</sup> | Mean        | ±SD  |
| <b>Aldehydes</b>     |                           |      |              |                  |              |                  |              |                  |             |                  |              |                  |             |                  |             |      |
| 8.98                 | Hexanal                   | 785  | n.d.         |                  | n.d.         |                  | n.d.         |                  | 0.40        | 0.08             | 0.60         | 0.03             | 1.72        | 0.17             | 0.78        | 0.13 |
|                      | <i>tot</i>                |      |              |                  |              |                  |              |                  | <b>0.40</b> |                  | <b>0.60</b>  |                  | <b>1.72</b> |                  | <b>0.78</b> |      |
| <b>Alcohols</b>      |                           |      |              |                  |              |                  |              |                  |             |                  |              |                  |             |                  |             |      |
| 20.02                | 1-Hexanol                 | 831  | n.d.         |                  | n.d.         |                  | n.d.         |                  | 2.11        | 0.39             | 3.38         | 0.01             | 3.65        | 0.37             | 2.21        | 0.30 |
|                      | <i>tot</i>                |      |              |                  |              |                  |              |                  | <b>2.11</b> |                  | <b>3.38</b>  |                  | <b>3.65</b> |                  | <b>2.21</b> |      |
| <b>Esters</b>        |                           |      |              |                  |              |                  |              |                  |             |                  |              |                  |             |                  |             |      |
| 21.66                | Butanoic acid-hexyl ester | 1183 | 10.21        | 0.72             | 11.37        | 2.56             | 4.80         | 0.18             | 6.08        | 1.21             | 8.01         | 0.41             | 4.93        | 0.47             | 5.87        | 1.63 |
| 24.93                | (-)-Menthyl acetate       | 1381 | n.d.         |                  | n.d.         |                  | 5.11         | 2.71             | n.d.        |                  | 1.51         | 0.00             | n.d.        |                  | 1.08        | 1.53 |
| 29.81                | β-phenethyl acetate       | 1410 | 2.77         | 0.95             | 2.23         | 0.02             | 0.75         | 0.08             | 0.40        | 0.07             | 0.54         | 0.03             | 0.36        | 0.04             | 0.42        | 0.34 |
|                      | <i>tot</i>                |      | <b>12.98</b> |                  | <b>13.60</b> |                  | <b>10.66</b> |                  | <b>6.48</b> |                  | <b>10.06</b> |                  | <b>5.29</b> |                  | <b>7.37</b> |      |
| <b>Organic acids</b> |                           |      |              |                  |              |                  |              |                  |             |                  |              |                  |             |                  |             |      |
| 22.1                 | Acetic acid               | 576  | n.d.         |                  | n.d.         |                  | n.d.         |                  | 1.03        | 0.21             | 0.81         | 0.04             | 6.38        | 0.87             | 7.01        | 1.22 |
| 26.17                | Butanoic acid             | 775  | 2.89         | 0.11             | n.d.         |                  | n.d.         |                  | 0.99        | 0.21             | 0.37         | 0.02             | n.d.        |                  | n.d.        |      |
| 30.33                | Hexanoic acid             | 974  | 0.54         | 0.27             | 4.28         | 1.23             | 2.37         | 0.34             | 0.41        | 0.08             | 1.33         | 0.07             | 0.22        | 0.02             | 1.15        | 1.43 |
| 31.96                | Heptanoic acid            | 1073 | 0.17         | 0.01             | n.d.         |                  | n.d.         |                  | 0.15        | 0.03             | 0.36         | 0.00             | 0.21        | 0.02             | 0.23        | 0.03 |
| 33.04                | Octanoic acid             | 1173 | 0.63         | 0.17             | 1.10         | 0.42             | 0.14         | 0.00             | 0.07        | 0.01             | 0.29         | 0.00             | 0.19        | 0.03             | 0.20        | 0.05 |
| 34.11                | Nonanoic acid             | 1272 | 0.56         | 0.11             | 0.68         | 0.11             | 0.25         | 0.01             | 0.15        | 0.03             | 0.44         | 0.00             | 0.35        | 0.02             | 0.32        | 0.10 |
|                      | <i>tot</i>                |      | <b>4.78</b>  |                  | <b>6.06</b>  |                  | <b>2.75</b>  |                  | <b>2.80</b> |                  | <b>3.60</b>  |                  | <b>7.35</b> |                  | <b>8.91</b> |      |
| <b>Monoterpenes</b>  |                           |      |              |                  |              |                  |              |                  |             |                  |              |                  |             |                  |             |      |
| 9.88                 | β-Pinene                  | 989  | 5.15         | 0.05             | 5.62         | 2.52             | 9.41         | 2.91             | 4.00        | 0.74             | 3.06         | 0.26             | 4.61        | 0.44             | 2.85        | 0.77 |
| 12.14                | δ-3-Carene                | 1015 | 15.67        | 1.65             | 15.31        | 2.62             | 16.48        | 3.68             | 14.66       | 2.73             | 10.37        | 0.88             | 12.91       | 1.24             | 9.35        | 0.60 |
| 12.94                | α-Phellandrene            | 1017 | 17.69        | 1.73             | 20.98        | 5.17             | 6.42         | 0.21             | 6.87        | 1.28             | 7.43         | 0.38             | 6.64        | 0.64             | 8.41        | 0.36 |
| 13.38                | β-Myrcene                 | 1023 | 79.03        | 5.41             | 84.24        | 19.46            | 37.29        | 2.84             | 27.33       | 5.09             | 39.76        | 1.83             | 49.08       | 4.95             | 39.27       | 4.36 |
| 13.64                | α-Terpinene               | 1026 | 22.35        | 1.80             | 24.70        | 6.17             | 8.57         | 2.70             | 8.99        | 1.67             | 9.59         | 0.02             | 6.55        | 0.66             | 9.21        | 1.53 |



|                       |                              |      |               |       |               |       |               |       |               |       |               |       |               |       |               |      |
|-----------------------|------------------------------|------|---------------|-------|---------------|-------|---------------|-------|---------------|-------|---------------|-------|---------------|-------|---------------|------|
| 14.48                 | $\alpha$ -Linonene           | 1038 | 24.28         | 0.71  | 26.43         | 5.80  | 11.43         | 1.66  | 11.50         | 2.43  | 12.11         | 0.62  | 11.65         | 1.12  | 11.91         | 2.28 |
| 14.78                 | $\beta$ -Sabinene            | 1044 | 34.87         | 4.96  | 39.93         | 12.22 | 17.45         | 0.92  | 18.07         | 3.36  | 21.80         | 1.11  | 23.54         | 3.22  | 19.16         | 3.61 |
| 16.43                 | $\gamma$ -Terpinene          | 1066 | 18.05         | 2.01  | 21.50         | 5.33  | 7.14          | 0.34  | 9.06          | 1.69  | 11.98         | 0.02  | 7.34          | 0.70  | 10.51         | 2.03 |
| 16.9                  | $\beta$ -Ocimene             | 1070 | 61.33         | 0.57  | 69.03         | 21.03 | 30.81         | 0.42  | 26.25         | 4.89  | 36.62         | 1.86  | 32.79         | 3.15  | 34.70         | 2.72 |
| 17.26                 | p-Cymene                     | 1083 | 53.75         | 27.96 | 72.47         | 29.86 | 44.99         | 20.41 | 40.15         | 8.83  | 39.92         | 2.03  | 15.16         | 1.46  | 25.04         | 4.22 |
| 17.71                 | $\alpha$ -Terpinolene        | 1094 | 340.98        | 13.36 | 335.47        | 87.70 | 171.57        | 4.28  | 147.70        | 27.49 | 198.41        | 10.08 | 216.78        | 56.06 | 195.03        | 7.82 |
| 21.98                 | Cymenene                     | 1120 | 20.30         | 0.81  | 26.88         | 9.10  | 21.41         | 4.98  | 30.03         | 5.59  | 29.19         | 1.48  | 8.43          | 0.81  | 11.57         | 2.78 |
| 22.63                 | 4.8-epoxy-p-Menth-1-ene      | 1177 | 2.00          | 0.40  | 2.42          | 0.28  | 34.23         | 17.58 | 1.44          | 0.27  | 2.32          | 0.00  | 1.68          | 0.17  | 1.62          | 0.65 |
| 23.13                 | cis-Menthone                 | 1198 | n.d.          |       | n.d.          |       | 10.98         | 3.42  | n.d.          |       | 0.86          | 0.04  | 0.55          | 0.62  | 0.42          | 0.13 |
| 24.66                 | Linalool                     | 1209 | 5.41          | 1.00  | 5.48          | 0.09  | 2.92          | 0.42  | 6.27          | 1.01  | 3.66          | 0.19  | 1.92          | 1.31  | 2.69          | 3.15 |
| 26.53                 | Menthol                      | 1217 | 0.00          | 0.00  | 0.00          | 0.00  | 13.67         | 9.27  | 0.55          | 0.10  | 9.80          | 0.02  | n.d.          |       | n.d.          |      |
| 27.41                 | 1.8-Menthadien-4-ol          | 1225 | 2.12          | 0.07  | 2.59          | 0.10  | 0.00          | 0.00  | 1.91          | 0.35  | 1.07          | 0.00  | 0.95          | 0.09  | 1.99          | 0.87 |
| 27.6                  | $\alpha$ -Terpineol          | 1245 | 7.94          | 0.16  | 10.58         | 1.99  | 5.66          | 0.47  | 7.55          | 1.41  | 6.34          | 0.01  | 4.49          | 0.45  | 5.13          | 3.07 |
| 29.66                 | <i>trans</i> -2.3-Epoxycaren | 1293 | 0.28          | 0.01  | 9.24          | 2.55  | 0.00          | 0.00  | 0.16          | 0.03  | 0.00          | 0.00  | 0.18          | 0.02  | 0.39          | 0.25 |
| 30.4                  | p-Cymenol                    |      | 3.10          | 0.24  | 0.34          | 0.10  | 0.59          | 0.24  | 2.40          | 0.45  | 2.63          | 0.17  | 1.49          | 0.20  | 2.48          | 1.48 |
|                       | <b>tot</b>                   |      | <b>714.30</b> |       | <b>773.22</b> |       | <b>451.03</b> |       | <b>364.90</b> |       | <b>446.93</b> |       | <b>406.73</b> |       | <b>391.72</b> |      |
| <b>Sesquiterpenes</b> |                              |      |               |       |               |       |               |       |               |       |               |       |               |       |               |      |
| 25.58                 | $\gamma$ -Caryophyllene      | 1482 | 36.90         | 6.05  | 40.26         | 3.45  | 29.14         | 4.84  | 38.82         | 7.23  | 5.14          | 0.26  | 13.11         | 1.32  | 23.12         | 11.8 |
| 27.05                 | $\alpha$ -Humulene           | 1494 | 8.37          | 0.77  | 8.65          | 0.10  | 6.83          | 0.44  | 9.41          | 1.75  | 1.69          | 0.09  | 3.26          | 0.45  | 5.36          | 2.96 |
| 28.03                 | $\delta$ -Guaiene            | 1485 | 8.25          | 0.13  | 8.48          | 1.06  | 6.33          | 0.57  | 6.66          | 1.58  | 7.78          | 0.40  | 2.34          | 0.22  | 3.50          | 1.75 |
| 28.14                 | $\beta$ -Selinene            | 1490 | 2.29          | 0.24  | 2.55          | 1.09  | 1.77          | 0.29  | 2.41          | 0.45  | 2.73          | 0.01  | 0.80          | 0.05  | 1.44          | 0.38 |
| 28.33                 | $\alpha$ -Gurjunene          | 1507 | 2.04          | 0.13  | 2.46          | 0.53  | 1.48          | 0.03  | 2.30          | 0.43  | 2.43          | 0.12  | 0.75          | 0.07  | 1.77          | 0.36 |
| 29.02                 | $\beta$ -Maaliene            | 1519 | 1.30          | 0.06  | 1.31          | 0.05  | 0.48          | 0.67  | 1.04          | 0.19  | 1.35          | 0.00  | 3.46          | 0.20  | 1.27          | 0.46 |
| 29.19                 | Selina-3.7(11)-diene         | 1527 | 15.30         | 0.20  | 8.88          | 9.15  | 10.21         | 1.52  | 12.58         | 2.34  | 13.88         | 0.91  | 4.64          | 0.63  | 7.96          | 3.23 |
|                       | <b>tot</b>                   |      | <b>74.44</b>  |       | <b>72.59</b>  |       | <b>56.24</b>  |       | <b>73.22</b>  |       | <b>35.00</b>  |       | <b>28.36</b>  |       | <b>44.42</b>  |      |

RT: retention time (min); Mean: Mean value (n = 3); Data are expressed in ppm SD: Standard deviation (n = 3); RI<sup>b</sup>: retention index calculated on a Rtx-Wax (30 m x 0.25 mm x 0.25 m f.t.)

**Table S6.** Concentration of terpenes (ppm) in Bedrocan oils obtained using MCT oil as a function of the storage time

| RT                          | Compound                  | RI   | Storage days |      |              |      |              |      |              |      |                   |      |                   |                  |                   |                  |
|-----------------------------|---------------------------|------|--------------|------|--------------|------|--------------|------|--------------|------|-------------------|------|-------------------|------------------|-------------------|------------------|
|                             |                           |      | T0           |      | T15          |      | T30          |      | T45          |      | T60               |      | T75               |                  | T90               |                  |
|                             |                           |      | Mean         | ±SD  | Mean         | ±SD  | Mean         | ±SD  | Mean         | ±SD  | Mean <sup>c</sup> | ±SD  | Mean <sup>c</sup> | ±SD <sup>d</sup> | Mean <sup>c</sup> | ±SD <sup>d</sup> |
| <b><u>Aldehydes</u></b>     |                           |      |              |      |              |      |              |      |              |      |                   |      |                   |                  |                   |                  |
| 8.98                        | Hexanal                   | 785  | n.d.         |      | n.d.         |      | n.d.         |      | n.d.         |      | n.d.              |      | n.d.              |                  | n.d.              |                  |
|                             | <b>tot</b>                |      |              |      |              |      |              |      |              |      |                   |      |                   |                  |                   |                  |
| <b><u>Alcohols</u></b>      |                           |      |              |      |              |      |              |      |              |      |                   |      |                   |                  |                   |                  |
| 20.02                       | 1-Hexanol                 | 831  | n.d.         |      | n.d.         |      | n.d.         |      | 4.95         | 0.13 | 4.89              | 0.04 | 4.10              | 0.05             | 4.61              | 0.15             |
|                             | <b>tot</b>                |      |              |      |              |      |              |      | <b>4.95</b>  |      | <b>4.89</b>       |      | <b>4.10</b>       |                  | <b>4.61</b>       |                  |
| <b><u>Esters</u></b>        |                           |      |              |      |              |      |              |      |              |      |                   |      |                   |                  |                   |                  |
| 21.66                       | Butanoic acid-hexyl ester | 1183 | 11.57        | 3.73 | 12.37        | 1.94 | 7.75         | 0.45 | 5.68         | 0.14 | 15.78             | 0.14 | 11.63             | 1.50             | 5.96              | 0.44             |
| 24.93                       | (-)-Menthyl acetate       | 1381 | n.d.         |      | n.d.         |      | 8.21         | 4.22 | n.d.         |      | n.d.              |      | n.d.              |                  | n.d.              |                  |
| 29.81                       | β-phenethyl acetate       | 1410 | 2.98         | 0.27 | 2.54         | 0.98 | 1.21         | 0.11 | n.d.         |      | n.d.              |      | n.d.              |                  | n.d.              |                  |
|                             | <b>tot</b>                |      | <b>14.55</b> |      | <b>14.90</b> |      | <b>17.17</b> |      | <b>5.68</b>  |      | <b>15.78</b>      |      | <b>11.63</b>      |                  | <b>5.96</b>       |                  |
| <b><u>Organic acids</u></b> |                           |      |              |      |              |      |              |      |              |      |                   |      |                   |                  |                   |                  |
| 22.1                        | Acetic acid               | 576  | n.d.         |      | n.d.         |      | n.d.         |      | 10.72        | 0.27 | 3.97              | 0.04 | 16.78             | 0.22             | 12.54             | 4.71             |
| 26.17                       | Butanoic acid             | 775  | 3.23         | 0.70 | n.d.         |      | 0.95         | 1.35 | 9.97         | 0.25 | 3.56              | 0.74 | 0.90              | 0.01             | 0.47              | 0.03             |
| 30.33                       | Hexanoic acid             | 974  | 0.56         | 0.15 | 4.60         | 0.42 | 3.81         | 0.47 | 0.39         | 0.01 | 0.37              | 0.00 | 0.30              | 0.12             | 0.11              | 0.01             |
| 31.96                       | Heptanoic acid            | 1073 | 0.19         | 0.06 | n.d.         |      | n.d.         |      | 0.12         | 0.00 | 0.19              | 0.00 | 0.15              | 0.00             | 0.13              | 0.00             |
| 33.04                       | Octanoic acid             | 1173 | 0.68         | 0.02 | 1.34         | 0.95 | 0.22         | 0.01 | 0.60         | 0.02 | 0.35              | 0.00 | 0.38              | 0.00             | 0.13              | 0.00             |
| 34.11                       | Nonanoic acid             | 1272 | 0.62         | 0.03 | 0.80         | 0.42 | 0.40         | 0.02 | 0.31         | 0.01 | 0.37              | 0.00 | 0.17              | 0.02             | 0.28              | 0.01             |
|                             | <b>tot</b>                |      | <b>5.28</b>  |      | <b>6.74</b>  |      | <b>5.38</b>  |      | <b>22.12</b> |      | <b>8.82</b>       |      | <b>18.67</b>      | <b>0.38</b>      | <b>13.66</b>      |                  |
| <b><u>Monoterpenes</u></b>  |                           |      |              |      |              |      |              |      |              |      |                   |      |                   |                  |                   |                  |
| 9.88                        | β-Pinene                  | 989  | 6.63         | 0.34 | 5.84         | 0.47 | 15.16        | 4.41 | 6.15         | 0.16 | 5.87              | 0.05 | 9.58              | 2.54             | 8.78              | 0.28             |
| 12.14                       | δ-3-Carene                | 1015 | 17.37        | 2.62 | 16.82        | 3.54 | 26.56        | 5.43 | 25.40        | 0.64 | 25.00             | 1.20 | 22.32             | 5.91             | 16.78             | 1.25             |
| 12.94                       | α-Phellandrene            | 1017 | 19.62        | 3.10 | 22.71        | 3.05 | 10.36        | 0.14 | 10.54        | 0.27 | 26.69             | 0.24 | 12.34             | 3.27             | 9.24              | 2.58             |

|                       |                              |      |               |       |               |       |               |       |               |       |               |      |               |      |               |       |
|-----------------------|------------------------------|------|---------------|-------|---------------|-------|---------------|-------|---------------|-------|---------------|------|---------------|------|---------------|-------|
| 13.38                 | $\beta$ -Myrcene             | 1023 | 88.01         | 16.48 | 91.49         | 13.75 | 60.20         | 3.42  | 57.63         | 1.46  | 85.61         | 0.78 | 73.38         | 0.94 | 59.21         | 1.87  |
| 13.64                 | $\alpha$ -Terpinene          | 1026 | 25.36         | 8.40  | 26.73         | 3.50  | 13.80         | 4.10  | 16.92         | 0.43  | 20.56         | 0.19 | 18.82         | 0.24 | 15.58         | 1.16  |
| 14.48                 | $\alpha$ -Linonene           | 1038 | 27.17         | 6.14  | 28.77         | 4.66  | 18.44         | 2.32  | 16.56         | 0.42  | 30.40         | 0.28 | 18.89         | 5.00 | 21.02         | 5.88  |
| 14.78                 | $\beta$ -Sabinene            | 1044 | 38.46         | 4.38  | 42.73         | 3.12  | 28.20         | 2.02  | 29.60         | 0.75  | 41.12         | 0.38 | 39.73         | 0.51 | 30.39         | 0.96  |
| 16.43                 | $\gamma$ -Terpinene          | 1066 | 20.57         | 7.41  | 23.27         | 3.10  | 11.55         | 0.78  | 14.10         | 0.36  | 23.34         | 0.21 | 20.71         | 2.66 | 16.45         | 1.22  |
| 16.9                  | $\beta$ -Ocimene             | 1070 | 68.82         | 16.86 | 73.89         | 5.50  | 49.78         | 1.64  | 47.02         | 2.83  | 78.10         | 0.71 | 58.64         | 7.55 | 56.30         | 4.18  |
| 17.26                 | p-Cymene                     | 1083 | 64.38         | 46.75 | 75.92         | 3.07  | 72.98         | 34.36 | 70.81         | 79.87 | 11.18         | 0.10 | 74.46         | 9.58 | 38.01         | 10.63 |
| 17.71                 | $\alpha$ -Terpinolene        | 1094 | 381.13        | 82.33 | 389.63        | 35.15 | 277.07        | 1.57  | 241.02        | 6.10  | 344.83        | 3.15 | 339.90        | 4.37 | 323.25        | 10.19 |
| 21.98                 | Cymenene                     | 1120 | 22.92         | 6.70  | 28.57         | 1.11  | 34.66         | 8.71  | 57.87         | 1.46  | 60.50         | 0.55 | 26.01         | 0.33 | 31.68         | 2.35  |
| 22.63                 | 4.8-epoxy-p-Menth-1-ene      | 1177 | 2.19          | 0.12  | 2.69          | 0.71  | 55.02         | 27.33 | 0.00          | 0.00  | 3.21          | 0.03 | 2.28          | 0.03 | n.d.          |       |
| 23.13                 | cis-Menthone                 | 1198 | n.d.          |       | n.d.          |       | 17.68         | 5.19  | n.d.          |       | 1.92          | 0.02 | 0.58          | 0.01 | 0.53          | 0.01  |
| 24.66                 | Linalool                     | 1209 | 5.93          | 0.43  | 6.20          | 2.22  | 4.71          | 0.59  | 3.72          | 0.09  | 6.15          | 0.06 | 4.34          | 0.06 | 3.06          | 0.04  |
| 26.53                 | Menthol                      | 1217 | n.d.          |       | n.d.          |       | 21.94         | 14.54 | n.d.          |       | 0.92          | 0.01 | n.d.          |      | 1.64          | 0.12  |
| 27.41                 | 1.8-Menthadien-4-ol          | 1225 | 2.39          | 0.68  | 2.92          | 0.98  | n.d.          |       | 2.61          | 0.07  | 3.97          | 0.16 | 2.05          | 0.03 | 1.67          | 0.02  |
| 27.6                  | $\alpha$ -Terpineol          | 1245 | 8.90          | 2.09  | 11.59         | 2.24  | 9.13          | 0.58  | 9.68          | 0.25  | 11.94         | 0.11 | 8.59          | 0.11 | 4.99          | 0.16  |
| 29.66                 | <i>trans</i> -2.3-Epoxycaren | 1293 | n.d.          |       | n.d.          |       | n.d.          |       | n.d.          |       | n.d.          |      | n.d.          |      | n.d.          |       |
| 30.4                  | p-Cymenol                    |      | 3.45          | 0.61  | 0.37          | 0.03  | 0.96          | 0.41  | 12.63         | 14.31 | 3.86          | 0.04 | 2.73          | 0.04 | 1.91          | 0.06  |
|                       | <b><i>tot</i></b>            |      | <b>803.31</b> |       | <b>850.14</b> |       | <b>728.20</b> |       | <b>622.27</b> |       | <b>785.16</b> |      | <b>735.34</b> |      | <b>640.48</b> |       |
| <b>Sesquiterpenes</b> |                              |      |               |       |               |       |               |       |               |       |               |      |               |      |               |       |
| 25.58                 | $\gamma$ -Caryophyllene      | 1482 | 40.59         | 3.74  | 44.97         | 13.21 | 47.00         | 6.91  | 54.82         | 1.39  | 73.98         | 0.68 | 49.61         | 0.64 | 25.95         | 0.82  |
| 27.05                 | $\alpha$ -Humulene           | 1494 | 9.29          | 1.52  | 9.80          | 3.57  | 11.03         | 0.50  | n.d.          |       | 20.46         | 0.19 | 8.32          | 1.07 | 4.61          | 0.07  |
| 28.03                 | $\delta$ -Guaiene            | 1485 | 9.24          | 2.20  | 9.40          | 2.40  | 10.21         | 0.73  | 12.55         | 0.32  | 16.46         | 0.15 | 7.50          | 0.97 | 2.52          | 0.19  |
| 28.14                 | $\beta$ -Selinene            | 1490 | 2.60          | 0.93  | 2.66          | 0.15  | 2.86          | 0.41  | 3.87          | 0.10  | 5.69          | 0.12 | 3.19          | 0.04 | 1.27          | 0.02  |
| 28.33                 | $\alpha$ -Gurjunene          | 1507 | 2.28          | 0.44  | 2.68          | 0.44  | 2.40          | 0.09  | 3.38          | 0.09  | 5.04          | 0.05 | 2.59          | 0.33 | 1.04          | 0.01  |
| 29.02                 | $\beta$ -Maaliene            | 1519 | 1.47          | 0.44  | 1.47          | 0.50  | 0.76          | 1.07  | 1.73          | 0.04  | 2.44          | 0.02 | 13.73         | 0.18 | 0.52          | 0.04  |
| 29.19                 | Selina-3.7(11)-diene         | 1527 | 17.21         | 4.59  | 12.03         | 14.17 | 16.47         | 2.14  | 22.22         | 0.07  | 28.50         | 0.26 | 16.30         | 2.10 | 7.69          | 0.24  |
|                       | <b><i>tot</i></b>            |      | <b>82.69</b>  |       | <b>83.01</b>  |       | <b>90.72</b>  |       | <b>98.56</b>  |       | <b>152.56</b> |      | <b>101.24</b> |      | <b>43.60</b>  |       |

RT: retention time (min); Mean: Mean value (n = 3); Data are expressed in ppm SD: Standard deviation (n = 3); RI<sup>b</sup>: retention index calculated on a Rtx-Wax (30 m x 0.25 mm x 0.25 m f.t.)
